CORRECTION

# Correction: Trends, and patterns, of premarital sexual intercourse and its associated factors among never-married young women aged 15–24 in Sierra Leone

Augustus Osborne, Castro Ayebeng, Peter Bai James, Camilla Bangura, Richard Gyan Aboagye, Bright Opoku Ahinkorah

The comma after trends and patterns should be omitted in the article title. The correct title is: Trends and patterns of premarital sexual intercourse and its associated factors among never-married young women aged 15–24 in Sierra Leone. The correct citation is: Osborne A, Ayebeng C, James PB, Bangura C, Aboagye RG, Ahinkorah BO (2024) Trends and patterns of premarital sexual intercourse and its associated factors among never-married young women aged 15–24 in Sierra Leone. PLoS ONE 19(8): e0309200. <https://doi.org/10.1371/journal.pone.0309200>

## Reference

1. Osborne A, Ayebeng C, James PB, Bangura C, Aboagye RG, Ahinkorah BO. Trends, and patterns, of premarital sexual intercourse and its associated factors among never-married young women aged 15–24 in Sierra Leone. PLoS ONE. 2024;19(8):e0309200. <https://doi.org/10.1371/journal.pone.0309200>

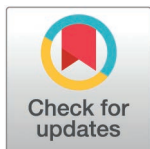

## OPEN ACCESS

**Citation:** Osborne A, Ayebeng C, James PB, Bangura C, Aboagye RG, Ahinkorah BO (2025) Correction: Trends, and patterns, of premarital sexual intercourse and its associated factors among never-married young women aged 15–24 in Sierra Leone. PLoS One 20(7): e0327679. <https://doi.org/10.1371/journal.pone.0327679>

**Published:** July 2, 2025

**Copyright:** © 2025 Osborne et al. This is an open access article distributed under the terms of the [Creative Commons Attribution License](https://creativecommons.org/licenses/by/4.0/), which permits unrestricted use, distribution, and reproduction in any medium, provided the original author and source are credited.
